# Supplementary material for: Hybrid organic–inorganic triguanidine arsenate dihydrate for ultraviolet nonlinear optical application
Source: Royal Society of Chemistry journal article supplement (doi:10.1039/d1dt03323a), 2021-12-15
Supplement: d1dt03323a1.pdf [file d1dt03323a1.pdf]

## **Hybrid organic-inorganic triguanidine arsenate dihydrate for ultraviolet nonlinear optical application**

Dongmei Wang<sup>a, b</sup>, Zhuangzhuang Wei<sup>a, b, d</sup>, Zhiyong Bai<sup>a, e</sup>, Lehui Liu<sup>a, c</sup>, Zhoubin Lin<sup>a, c\*, e</sup>, Lizhen Zhang<sup>a, c\*, e</sup>

<sup>a</sup>Key Laboratory of Optoelectronic Materials Chemistry and Physics, Fujian Institute of Research on the Structure of Matter, Chinese Academy of Sciences, Fuzhou, Fujian, 350002, P. R. China

<sup>b</sup> College of Chemistry and Materials Science, Fujian Normal University, Fuzhou, 350007, China

<sup>c</sup>Fujian Science & Technology Innovation Laboratory for Optoelectronic Information of China, Fuzhou, Fujian, 350108, China

<sup>d</sup>Xiamen Key Laboratory of Rare Earth Photoelectric Functional Materials, Xiamen Institute of Rare Earth Materials, Haixi Institutes, Chinese Academy of Sciences, Xiamen 361021, P. R. China

<sup>e</sup> University of Chinese Academy of Sciences, Beijing 100049, P. R. China

\*Corresponding author, E-mail: lzb@fjirsm.ac.cn; lzzhang@fjirsm.ac.cn.

**Crystal Growth.** As source materials, the chemical reagents  $[\text{C}(\text{NH}_2)_3]_2\text{CO}_3$  (99%, Aladdin) and  $\text{NH}_4\text{H}_2\text{AsO}_4$  (98%, Alfa Aesar), ethanol (AR) were received without further purification. Initially, the mixture of  $[\text{C}(\text{NH}_2)_3]_2\text{CO}_3$  and  $\text{NH}_4\text{H}_2\text{AsO}_4$  with molar ratio 3:2 were dissolved in the deionized water and magnetically stirred at 35 °C for 1 h. The solution was evaporated at room temperature for several days, and then colorless rod-shaped single crystals with the largest length of about 20 mm were obtained. The obtained crystals were recrystallized in the solvent composed of certain ratio of deionized water and ethanol. Through evaporating the solution at room temperature for days, transparent and wafer well-developed bulk single crystals were obtained.

**Powder X-ray Diffraction.** X-ray powder diffraction measurement was obtained with the Miniflex 600 diffractometer using Cu  $K\alpha$  radiation ( $\lambda = 1.5406 \text{ \AA}$ ). Data were collected from the  $2\theta$  range  $10\sim 70^\circ$  with an increment of  $8^\circ/\text{min}$  at room temperature. The experimental powder X-ray diffraction results and theoretical simulation patterns present good agreement.

**Single Crystal X-ray Diffraction.** The single crystal X-ray diffraction data for the compounds were collected using a Rigaku ROD, Synergy Custom system, HyPix diffractometer operating with Ga  $K\alpha$  radiation ( $\lambda=1.3405\text{\AA}$ ) at 100 K (GZCO and GZSO) and 235 K (GAO), respectively. All the collected data were corrected for Lorentz, polarization factors and absorption. Using the Olex2 program, the structure was solved and refined with the ShelXT structure solution program and the ShelXL refinement package, respectively. All of the atom corrections were carried out with anisotropic displacement parameters and secondary extinction correction. The structures were checked by Platon for searching missing symmetry elements and no higher symmetries were found. All of the Crystallographic data are listed in Tables S1 to S6.

**UV-Vis-NIR Transmittance Spectrum.** The UV-Vis-NIR transmittance spectrum in the wavelength region 200-800 nm was gathered using the Perkin-Elmer Lambda 950 UV/Vis/NIR spectrophotometer.

**Thermal Analysis.** Thermogravimetric (TG) analysis was characterized with a NETZSCH STA 449F3 technique. Sample powder (~10 mg) was placed in a crucible under the flowing argon atmosphere and the temperature was increased from 30 °C to 1000 °C with a rate of 10 °C/ min.

**Powder SHG Measurement.** The powder SHG characteristic of guanidinium-based crystals were employed for the method described in the reference<sup>1</sup> using Q-switched Nd:YAG solid-state laser at a wavelength of 1064 nm. To investigate its phase-matching behavior and the SHG efficiencies of every crystal, the polycrystalline of all the crystals were ground in a mortar and sieved into several different particle size ranges. Meanwhile, KDP sample particles with corresponding size were used as the standard for comparison.

**Computational Descriptions.** The band structure and the partial density of state were calculated by the VASP<sup>2</sup>, a plane-wave pseudopotential density functional theory (DFT) package. The exchange-correlation functionals were Perdew-Burke-Emzerhof (PBE) functional within the generalized gradient approximation (GGA)<sup>3</sup>. The number of plane waves included in the basis sets was determined by a cutoff energy of 420 eV. And the  $\Gamma$ -centered  $3 \times 3 \times 2$   $k$ -point sampling mesh was used for GZCO and GZSO, the  $\Gamma$ -centered  $4 \times 2 \times 2$   $k$ -point sampling mesh was adopted for GAO. The convergence criteria for energy and force are tightened to  $1 \times 10^{-4}$  eV and  $-0.05$  eV/ Å in all of the calculations.

**Birefringence Measurement.** The measurements of birefringence were carried out using a polarizing microscope (ZEISS Axio Scope. A1) which equipped with Berek compensator and 546 nm light source.

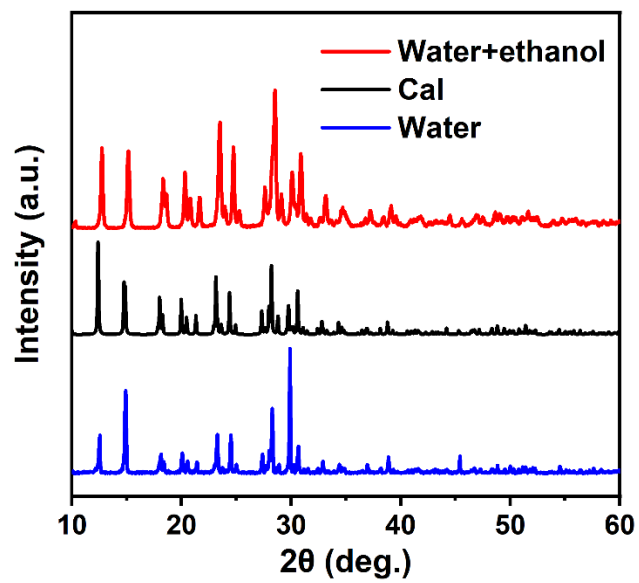

Figure S1. The powder XRD patterns.

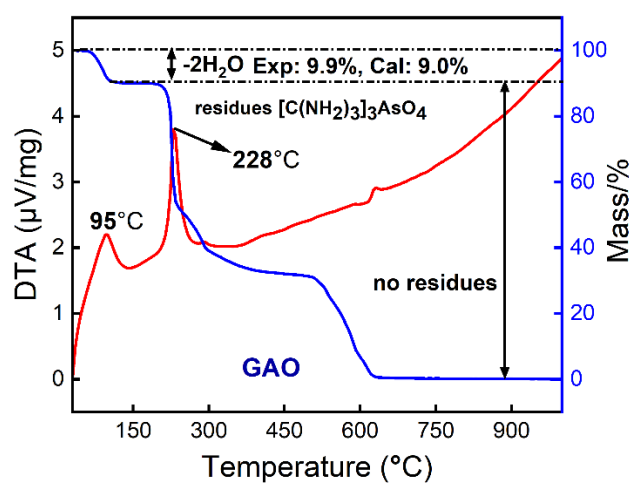

Figure S2. TG/DSC curves.

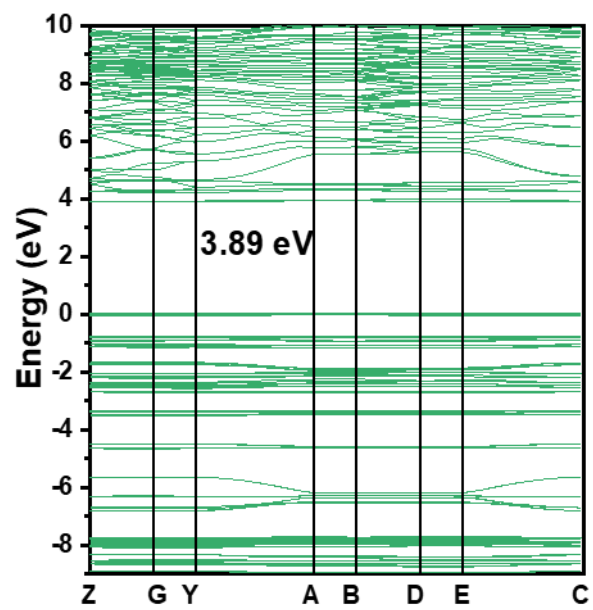

Figure S3. Band structure.

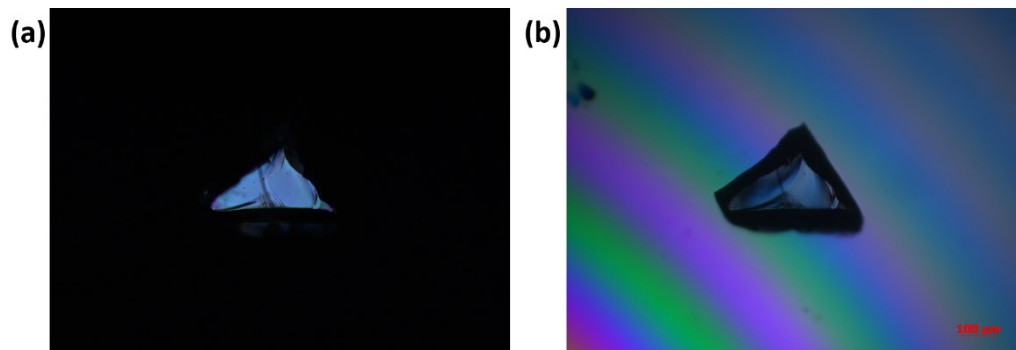

**Figure S4. Birefringence measurement of GAO.** (a) is complementary color before and (b) is complementary color after.

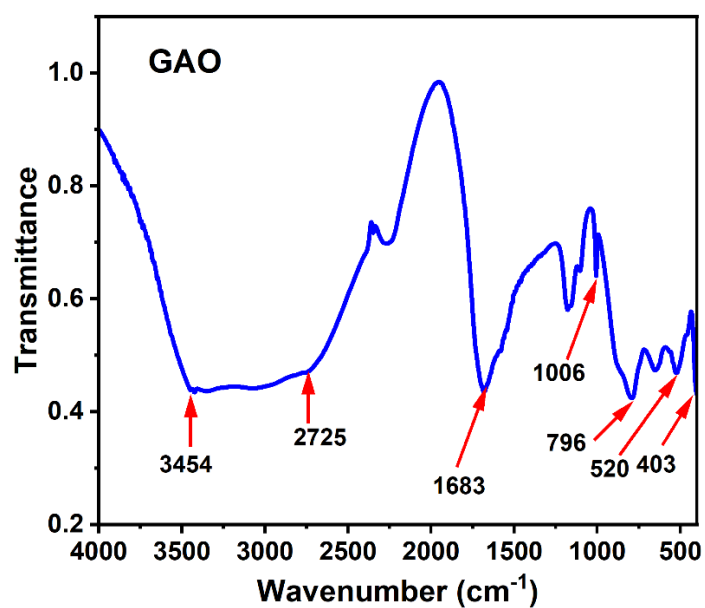

**Figure S5. IR spectrum of GAO.** The absorption bands from 3454-2725 cm<sup>-1</sup> are ascribed to vibration of hydron bonds, and the absorption peak at 1683 cm<sup>-1</sup> can be ascribed to the vibration of N-H bonds in (NH<sub>2</sub>)<sup>-1</sup>. The peaks at 1006 cm<sup>-1</sup> and 796 cm<sup>-1</sup> were assigned to the asymmetric stretching vibration and symmetric stretching vibration of As-O in AsO<sub>4</sub>, respectively, while the bending vibration absorptions could be observed at 403 and 520 cm<sup>-1</sup>.



**Table S1. Crystal data and structure refinement for GAO.**

| Crystal data and structure refinement for GAO |                                                                |
|-----------------------------------------------|----------------------------------------------------------------|
| Empirical formula                             | C <sub>3</sub> H <sub>22</sub> AsN <sub>9</sub> O <sub>6</sub> |
| Formula weight                                | 355.21                                                         |
| Temperature/K                                 | 235(30)                                                        |
| Crystal system                                | monoclinic                                                     |
| Space group                                   | <i>Cc</i>                                                      |
| a/Å                                           | 6.5850(3)                                                      |
| b/Å                                           | 17.7646(7)                                                     |
| c/Å                                           | 12.3972(5)                                                     |
| $\alpha$ /°                                   | 90                                                             |
| $\beta$ /°                                    | 104.506(4)                                                     |
| $\gamma$ /°                                   | 90                                                             |
| Volume/Å <sup>3</sup>                         | 1403.99(11)                                                    |
| Z                                             | 4                                                              |
| $\rho_{\text{calc}}$ g/cm <sup>3</sup>        | 1.680                                                          |
| $\mu$ /mm <sup>-1</sup>                       | 2.497                                                          |
| F (000)                                       | 736.0                                                          |
| Crystal size/mm <sup>3</sup>                  | 0.1 × 0.1 × 0.1                                                |
| Radiation                                     | GaK $\alpha$ ( $\lambda$ = 1.3405)                             |
| 2 $\theta$ range for data collection/°        | 8.656 to 103.606                                               |
| Index ranges                                  | -7 ≤ h ≤ 7, -20 ≤ k ≤ 20, -14 ≤ l ≤ 14                         |
| Reflections collected                         | 11259                                                          |
| Independent reflections                       | 2341 [R <sub>int</sub> = 0.0366, R <sub>sigma</sub> = 0.0261]  |
| Data/restraints/parameters                    | 2341/6/187                                                     |
| Goodness-of-fit on F <sup>2</sup>             | 1.013                                                          |
| Final R indexes [ $I \geq 2\sigma(I)$ ]       | R <sub>1</sub> = 0.0183, wR <sub>2</sub> = 0.0431              |
| Final R indexes [all data]                    | R <sub>1</sub> = 0.0188, wR <sub>2</sub> = 0.0433              |
| Largest diff. peak/hole / e Å <sup>-3</sup>   | 0.15/-0.17                                                     |
| Flack parameter                               | 0.003(13)                                                      |

**Table S2. Fractional Atomic Coordinates ( $\times 10^4$ ) and Equivalent Isotropic Displacement Parameters ( $\text{\AA}^2 \times 10^3$ ) for GAO.  $U_{\text{eq}}$  is defined as 1/3 of the trace of the orthogonalised  $U_{\text{IJ}}$  tensor.**

| Atom            | $x$       | $y$        | $z$        | $U(\text{eq})$ |
|-----------------|-----------|------------|------------|----------------|
| As <sub>1</sub> | 5227.8(2) | 6481.8(2)  | 5615.8(2)  | 18.30(13)      |
| N <sub>1</sub>  | 6441(5)   | 3660.1(18) | 7738(3)    | 31.3(8)        |
| N <sub>2</sub>  | 11609(5)  | 4324.3(16) | 7872(2)    | 29.7(7)        |
| N <sub>3</sub>  | 11413(5)  | 3039.9(17) | 7859(3)    | 32.0(8)        |
| O <sub>1</sub>  | 3973(3)   | 7287.1(12) | 5130.9(18) | 26.3(5)        |
| C <sub>1</sub>  | 11492(5)  | 3505.4(17) | 3077(3)    | 22.9(7)        |
| O <sub>2</sub>  | 7459(4)   | 6410.6(12) | 5188(2)    | 28.1(6)        |
| N <sub>4</sub>  | 6554(5)   | 4951.6(17) | 7808(2)    | 33.2(7)        |
| N <sub>5</sub>  | 9917(5)   | 3277.9(19) | 3454(3)    | 32.9(7)        |
| O <sub>3</sub>  | 3640(4)   | 5746.5(13) | 5185.0(19) | 30.2(5)        |
| N <sub>6</sub>  | 11103(5)  | 3925.7(15) | 2144(2)    | 26.6(6)        |
| N <sub>7</sub>  | 10119(5)  | 3695.4(16) | 6247(2)    | 29.8(7)        |
| C <sub>2</sub>  | 11043(5)  | 3688.9(19) | 7314(3)    | 24.1(7)        |
| C <sub>3</sub>  | 6021(5)   | 4321.5(19) | 7232(3)    | 25.3(7)        |
| O <sub>4</sub>  | 5890(4)   | 6481.0(11) | 7024.6(19) | 26.7(6)        |
| O <sub>5</sub>  | 5182(6)   | 2617.4(12) | 5673(4)    | 33.4(5)        |
| O <sub>6</sub>  | 9578(5)   | 4871.7(15) | 39(2)      | 34.5(6)        |
| N <sub>8</sub>  | 13470(6)  | 3374.9(18) | 3598(3)    | 37.3(9)        |
| N <sub>9</sub>  | 5084(5)   | 4353.7(17) | 6162(2)    | 32.3(7)        |

**Table S3. Anisotropic Displacement Parameters ( $\text{\AA}^2 \times 10^3$ ) for GAO. The****Anisotropic displacement factor exponent takes the form: -**

$$2\pi^2[h_2a^*2U_{11}+2hka^*b^*U_{12}+...].$$

| Atom            | $U_{11}$  | $U_{22}$  | $U_{33}$  | $U_{23}$ | $U_{13}$ | $U_{12}$ |
|-----------------|-----------|-----------|-----------|----------|----------|----------|
| As <sub>1</sub> | 18.40(18) | 17.27(18) | 18.75(17) | 0.9(2)   | 3.78(11) | 0.2(2)   |
| N <sub>1</sub>  | 36(2)     | 24.7(16)  | 32.8(18)  | 3.7(14)  | 7.9(15)  | 3.8(14)  |
| N <sub>2</sub>  | 36.1(16)  | 20.9(15)  | 31.4(15)  | 0.4(12)  | 6.9(13)  | 2.5(13)  |
| N <sub>3</sub>  | 40(2)     | 22.7(16)  | 28.4(16)  | 1.8(13)  | 0.3(14)  | -0.5(14) |
| O <sub>1</sub>  | 29.0(13)  | 20.1(12)  | 28.3(12)  | 4.0(10)  | 4.4(10)  | 3.9(10)  |
| C <sub>1</sub>  | 26.5(19)  | 17.8(17)  | 22.9(17)  | -6.1(12) | 3.8(14)  | -0.2(12) |
| O <sub>2</sub>  | 24.4(13)  | 28.1(13)  | 35.1(13)  | -3.9(9)  | 13.5(11) | -0.8(9)  |
| N <sub>4</sub>  | 44.1(18)  | 22.8(15)  | 28.1(15)  | 4.1(12)  | 0.2(13)  | 0.2(14)  |
| N <sub>5</sub>  | 26.9(17)  | 42(2)     | 29.0(17)  | 8.9(15)  | 4.6(13)  | -3.1(15) |
| O <sub>3</sub>  | 28.0(12)  | 23.1(12)  | 34.8(13)  | 2.8(10)  | -1.3(10) | -5.6(10) |
| N <sub>6</sub>  | 27.9(14)  | 27.3(16)  | 23.8(14)  | 0.4(12)  | 4.8(11)  | -1.1(12) |
| N <sub>7</sub>  | 36.7(18)  | 25.0(15)  | 24.8(16)  | 0.5(13)  | 2.4(13)  | -2.3(13) |
| C <sub>2</sub>  | 21.1(17)  | 22.4(18)  | 31(2)     | 1.7(15)  | 9.9(14)  | 1.5(14)  |
| C <sub>3</sub>  | 22.9(16)  | 24.7(17)  | 30.1(18)  | 3.9(14)  | 10.0(14) | 2.9(14)  |
| O <sub>4</sub>  | 33.2(14)  | 27.6(13)  | 18.6(12)  | 1.3(9)   | 5.4(10)  | 1.9(10)  |
| O <sub>5</sub>  | 34.2(12)  | 24.6(11)  | 42.7(13)  | 0.7(17)  | 11.7(10) | -0.2(17) |
| O <sub>6</sub>  | 39.7(16)  | 27.6(15)  | 35.9(14)  | 0.9(11)  | 8.6(12)  | 1.2(12)  |
| N <sub>8</sub>  | 28.3(19)  | 44(2)     | 38.5(19)  | 11.3(16) | 6.3(15)  | 4.5(15)  |
| N <sub>9</sub>  | 39.9(18)  | 25.2(16)  | 28.8(15)  | 0.4(13)  | 2.8(13)  | 1.0(13)  |

**Table S4. Bond Lengths for GAO.**

| Atom            | Atom           | Length/Å | Atom           | Atom           | Length/Å |
|-----------------|----------------|----------|----------------|----------------|----------|
| As <sub>1</sub> | O <sub>1</sub> | 1.686(2) | C <sub>1</sub> | N <sub>5</sub> | 1.304(5) |
| As <sub>1</sub> | O <sub>2</sub> | 1.687(2) | C <sub>1</sub> | N <sub>6</sub> | 1.346(4) |
| As <sub>1</sub> | O <sub>3</sub> | 1.675(2) | C <sub>1</sub> | N <sub>8</sub> | 1.322(5) |
| As <sub>1</sub> | O <sub>4</sub> | 1.691(2) | N <sub>4</sub> | C <sub>3</sub> | 1.326(5) |
| N <sub>1</sub>  | C <sub>3</sub> | 1.328(5) | N <sub>7</sub> | C <sub>2</sub> | 1.311(5) |
| N <sub>2</sub>  | C <sub>2</sub> | 1.328(5) | C <sub>3</sub> | N <sub>9</sub> | 1.317(4) |
| N <sub>3</sub>  | C <sub>2</sub> | 1.327(5) |                |                |          |

**Table S5. Bond Angles for GAO.**

| Atom           | Atom            | Atom           | Angle/°    | Atom           | Atom           | Atom           | Angle/°  |
|----------------|-----------------|----------------|------------|----------------|----------------|----------------|----------|
| O <sub>1</sub> | As <sub>1</sub> | O <sub>2</sub> | 109.81(11) | N <sub>8</sub> | C <sub>1</sub> | N <sub>6</sub> | 118.0(3) |
| O <sub>1</sub> | As <sub>1</sub> | O <sub>4</sub> | 110.22(10) | N <sub>2</sub> | C <sub>2</sub> | N <sub>3</sub> | 118.8(3) |
| O <sub>2</sub> | As <sub>1</sub> | O <sub>4</sub> | 107.77(12) | N <sub>7</sub> | C <sub>2</sub> | N <sub>2</sub> | 121.1(3) |
| O <sub>3</sub> | As <sub>1</sub> | O <sub>1</sub> | 109.70(12) | N <sub>7</sub> | C <sub>2</sub> | N <sub>3</sub> | 120.1(3) |
| O <sub>3</sub> | As <sub>1</sub> | O <sub>2</sub> | 111.38(11) | N <sub>1</sub> | C <sub>3</sub> | N <sub>4</sub> | 119.8(3) |
| O <sub>3</sub> | As <sub>1</sub> | O <sub>4</sub> | 107.92(11) | N <sub>9</sub> | C <sub>3</sub> | N <sub>1</sub> | 120.2(3) |
| N <sub>5</sub> | C <sub>1</sub>  | N <sub>6</sub> | 118.9(3)   | N <sub>9</sub> | C <sub>3</sub> | N <sub>4</sub> | 119.9(3) |
| N <sub>5</sub> | C <sub>1</sub>  | N <sub>8</sub> | 123.1(3)   |                |                |                |          |

**Table S6. Hydrogen Atom Coordinates ( $\text{\AA}\times 10^4$ ) and Isotropic Displacement Parameters ( $\text{\AA}^2\times 10^3$ ) for GAO.**

| Atom             | <i>x</i>  | <i>y</i> | <i>z</i> | U(eq)  |
|------------------|-----------|----------|----------|--------|
| H <sub>1</sub> A | 6097.1    | 3245.98  | 7361.51  | 38     |
| H <sub>1</sub> B | 7060.05   | 3640.67  | 8444.81  | 38     |
| H <sub>2</sub> A | 11367.99  | 4754.85  | 7529.2   | 36     |
| H <sub>2</sub> B | 12220.85  | 4310.29  | 8580.38  | 36     |
| H <sub>3</sub> A | 11042.87  | 2618.38  | 7507.2   | 38     |
| H <sub>3</sub> B | 12026.73  | 3036.04  | 8567.24  | 38     |
| H <sub>4</sub> A | 6284.65   | 5385.64  | 7477.89  | 40     |
| H <sub>4</sub> B | 7172.96   | 4930.8   | 8514.77  | 40     |
| H <sub>5</sub> A | 10144.95  | 3027.49  | 4075.86  | 40     |
| H <sub>5</sub> B | 8638.17   | 3376.36  | 3083.45  | 40     |
| H <sub>6</sub> A | 12138.65  | 3880.21  | 1813.41  | 32     |
| H <sub>6</sub> B | 9931.18   | 3787.92  | 1662.32  | 32     |
| H <sub>7</sub> A | 9866.59   | 4121.22  | 5891.91  | 36     |
| H <sub>7</sub> B | 9757.46   | 3273.95  | 5893.55  | 36     |
| H <sub>5</sub> C | 4340(60)  | 2250(20) | 5550(40) | 50     |
| H <sub>5</sub> D | 6320(50)  | 2440(20) | 5570(40) | 50     |
| H <sub>6</sub> C | 8880(70)  | 4480(20) | 180(40)  | 52     |
| H <sub>8</sub> A | 13769.89  | 3126.57  | 4222.53  | 45     |
| H <sub>8</sub> B | 14472.85  | 3537.36  | 3315.92  | 45     |
| H <sub>9</sub> A | 4738.43   | 3940.6   | 5783.36  | 39     |
| H <sub>9</sub> B | 4811.49   | 4787.98  | 5833.12  | 39     |
| H <sub>6</sub> D | 10720(70) | 4660(20) | 0(40)    | 48(14) |

**Table S7. The Dipole Moment of AsO<sub>4</sub> and CN<sub>3</sub> (unit: Debye).**

| Group               | x-component | y-component | z-component | total    |
|---------------------|-------------|-------------|-------------|----------|
| As(1)O <sub>4</sub> | 0.18371736  | 0.3023044   | 2.544362    | 2.568836 |
|                     | 0.30639106  | 0.2327393   | 2.54448     | 2.573407 |
|                     | 0.18361532  | -0.302304   | 2.544088    | 2.568557 |
|                     | 0.30666479  | -0.232558   | 2.544206    | 2.573152 |
| C(1)N <sub>3</sub>  | 0.05979394  | -0.005701   | -0.0068     | 0.060449 |
|                     | 0.05979417  | -0.005728   | -0.0068     | 0.060452 |
|                     | 0.05976373  | 0.0056795   | -0.00679    | 0.060416 |
|                     | 0.05976373  | 0.0056795   | -0.00679    | 0.060416 |
| C(2)N <sub>3</sub>  | 0.06799913  | -0.182762   | 0.326856    | 0.380606 |
|                     | 0.06801395  | -0.182762   | 0.326856    | 0.380608 |
|                     | 0.06800312  | 0.1827689   | 0.326858    | 0.380611 |
|                     | 0.0680477   | 0.1827488   | 0.32686     | 0.380611 |
| C(3)N <sub>3</sub>  | 0.08225378  | -1.3523     | -0.26458    | 1.380393 |
|                     | 0.08223093  | -1.352288   | -0.26458    | 1.38038  |
|                     | 0.08224616  | 1.3522873   | -0.26457    | 1.380378 |
|                     | 0.08224616  | 1.3522873   | -0.26457    | 1.380378 |

## Reference

1. S. K. Kurtz and T. T. Perry, *J. Appl. Phys.*, 1968, 39, 3798-3813.
2. G. Kresse, and Furthmüller, *Comput. Mater. Sci.*, 1996, 6, 15-50.
3. J. P. Perdew, K. Burke and M. Ernzerhof, *Phys. Rev. Lett.*, 1996, 77, 3865-3868.
